# Supplementary material
Source: publisher figshare collection journal article supplement (https://gsajournals.figshare.com/ndownloader/files/12776381)
Supplement: Supplementary file 1 [file 12776381]

Table S2. Phenotype Data for the Sanzi by Vita 7 population
Line	SeedCoat	PodTip
THA-1	0	0
THA-10	1	1
THA-101	1	1
THA-102	0	0
THA-104	1	1
THA-107	0	0
THA-109	1	1
THA-11	0	0
THA-110	1	1
THA-111	1	1
THA-113	0	0
THA-115	0	0
THA-116	1	1
THA-117	1	1
THA-118	1	1
THA-119	0	0
THA-12	0	0
THA-120	1	1
THA-121	0	0
THA-122	1	1
THA-123	1	1
THA-124	0	0
THA-125	1	1
THA-126	1	1
THA-127	0	0
THA-128	1	1
THA-129	0	NaN
THA-13	1	1
THA-130	1	1
THA-131	0	0
THA-132	0	0
THA-133	0	0
THA-134	1	1
THA-135	1	1
THA-137	1	1
THA-138	1	1
THA-142	0	0
THA-143	1	1
THA-145	1	1
THA-146	1	1
THA-147	0	0
THA-148	0	0
THA-149	0	0
THA-15	1	1
THA-150	0	0
THA-17	0	0
THA-18	1	1
THA-19	1	1
THA-2	0	0
THA-20	0	NaN
THA-21	0	NaN
THA-22	1	1
THA-23	0	0
THA-24	1	1
THA-25	0	0
THA-26	1	1
THA-27	0	0
THA-28	0	NaN
THA-3	1	1
THA-30	0	0
THA-31	1	1
THA-32	0	0
THA-33	0	0
THA-34	1	1
THA-35	0	NaN
THA-37	1	1
THA-38	1	1
THA-39	1	1
THA-4	0	0
THA-41	1	1
THA-43	1	1
THA-45	0	0
THA-46	1	1
THA-47	1	1
THA-48	1	1
THA-49	0	0
THA-50	1	1
THA-51	1	1
THA-52	1	1
THA-53	0	0
THA-54	0	0
THA-55	1	NaN
THA-56	0	NaN
THA-57	0	0
THA-58	1	1
THA-59	1	1
THA-6	0	0
THA-61	1	1
THA-62	0	0
THA-63	1	1
THA-65	1	1
THA-66	1	1
THA-67	1	1
THA-68	0	0
THA-69	1	1
THA-70	1	1
THA-71	1	1
THA-72	0	0
THA-73	1	1
THA-74	1	1
THA-75	1	1
THA-76	1	1
THA-77	1	1
THA-78	0	0
THA-79	1	1
THA-8	1	1
THA-80	0	0
THA-81	1	1
THA-82	0	0
THA-85	1	1
THA-86	1	1
THA-87	0	0
THA-89	0	0
THA-90	0	0
THA-93	1	1
THA-94	0	0
THA-95	1	1
THA-96	1	1
THA-97	1	1
THA-98	0	0
THA-99	0	0
